# Supplementary material
Source: publisher site journal article supplement (https://www.dovepress.com/get_supplementary_file.php?f=494208.docx)

**Table S1** Primers used in polymerase chain reaction and their sequences; the sequences of primers for capsular serotyping, virulence-associated genes, resistance genes and membrane pore protein genes.

| Primer name | Sequence (5’-3’) | Product size |
| --- | --- | --- |
| K1-F | GGTGCTCTTTACATCATTGC | 1283bp |
| K1-R | GCAATGGCCATTTGCGTTAG |  |
| K2-F | GACCCGATATTCATACTTGACAGAG | 641bp |
| K2-R | CCTGAAGTAAAATCGTAAATAGATGGC |  |
| K47-F | GGACGCACAGTTTCCCAATTCGC | 392bp |
| K47-R | GCCCACATGAACCCACTTGGCA |  |
| K57-F | CTCAGGGCTAGAAGTGTCAT | 1037bp |
| K57-R | CACTAACCCAGAAAGTCGAG |  |
| wzyKL64-F | TCAGTTCCGACCCTGATGCAGGTA | 268bp |
| wzyKL64-R | GCCAGAGCAACTATCATCCAAAGCCA |  |
| *rmpA*-F | ACGACTTTCAAGAGAAATGA | 434bp |
| *rmpA*-R | CATAGATGTCATAATCACAC |  |
| *rmpA2*-F | CTTTATGTGCAATAAGGATGTT | 452bp |
| *rmpA2*-R | CCTCCTGGAGAGTAAGCATT |  |
| *mrkD*-F | AAGCTATCGCTGTACTTCCGGCA | 340bp |
| *mrkD*-R | GGCGTTGGCGCTCAGATAGG |  |
| *aerobactin*-F | GCATAGGCGGATACGAACAT | 556bp |
| *aerobactin*-R | CACAGGGCAATTGCTTACCT |  |
| *magA*-F | GGTGCTCTTTACATCATTGC | 1283bp |
| *magA*-R | ATAGTAGGCGAGCACCGAGA |  |
| *wcaG*-F | GGTTGGKTCAGCAATCGTA | 169bp |
| *wcaG*-R | ACTATTCCGCCAACTTTTGC |  |
| *iucA*-F | CTC TTC CCG CTC GCT ATA CT | 116bp |
| *iucA*-R | GCA TTC CAC GCT TCA CTT CT |  |
| *allS*-F | CATTACGCACCTTTGTCAGC | 764bp |
| *allS*-R | GAATGTGTCGGCGATCAGCTT |  |
| *iroN*-F | GTCCGGCGGTAACTTCAGCC | 829bp |
| *iroN*-R | TCAGAATGAAACTACCGCCC |  |
| *blaKPC*-F | CGTCTAGTTCTGCTGTCTTG | 798bp |
| *blaKPC*-R | CTTGTCATCCTTGTTAGGCG |  |
| *blaIMP-F* | GGAATAGAGTGGCTTAAYTCTC | 232bp |
| *blaIMP-R* | GGTTTAAYAAAACAACCACC |  |
| *blaNDM*-F | GGTTTGGCGATCTGGTTTTC | 621bp |
| *blaNDM*-R | CGGAATGGCTCATCACGATC |  |
| *blaVIM* -F | GATGGTGTTTGGTCGCATA | 556bp |
| *blaVIM*-R | CGAATGCGCAGCACCAG |  |
| *blaOXA-48*-F | GCGTGGTTAAGGATGAACAC | 390bp |
| *blaOXA-48*-R | CATCAAGTTCAACCCAACCG |  |
| ompK35-F | ATGATGAAGCGCAATATTCTGGCA  GTGG | 682bp |
| ompK35-R | TCGGCTTTGTCGCCATTGCCGTCA |  |
| ompK36-F | ATGAAAGTTAAAGTACTGTCCCTC | 1062bp |
| ompK36-R | GTCGTCGGTAGAGATACCGGC |  |
| ompK37-F | GGCGATTACGGCTCCTT | 265bp |
| ompK37-R | TGCTGCGGTTATTGGTG |  |

F: forward primer; R: reverse primer

**Figure S1.** ERIC-PCR of 54 carbapenem-resistant hypervirulent *Klebsiella pneumoniae* strains.


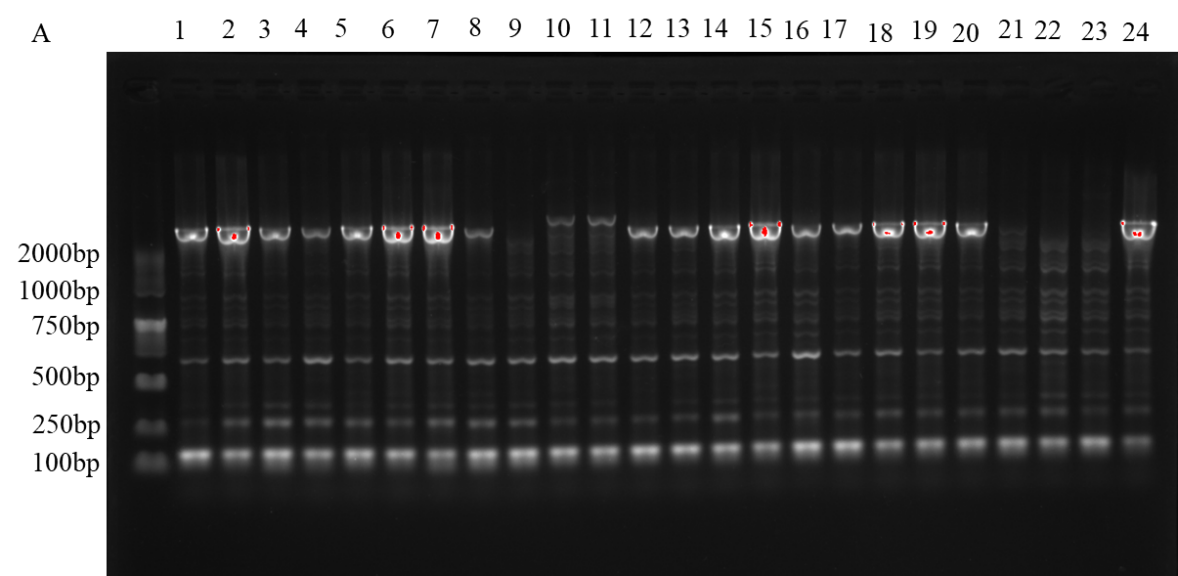


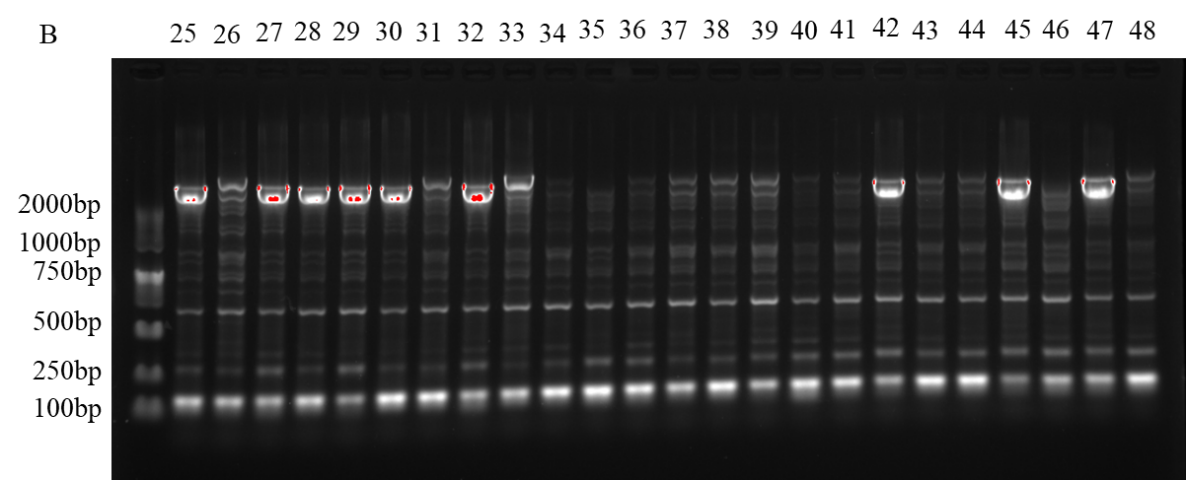


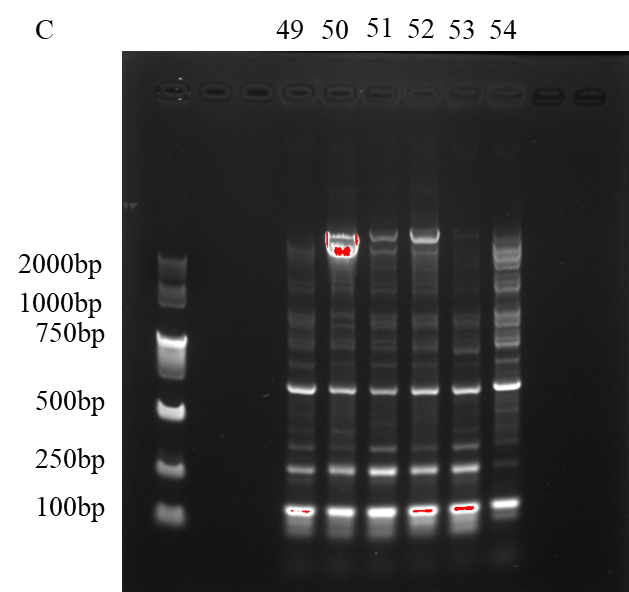

Supplement: Supplementary file 1 [file get_supplementary_file.php]
